# Supplementary material for: In Vitro and In Vivo Studies of Melanoma Cell Migration by Antagonistic Mimetics of Adhesion Molecule L1CAM
Source: MDPI journal article supplement (doi:10.3390/ijms25094811), 2024-04-28
Supplement: s1 [file s1]

# Scratch assay figures

## Supplementary material 1

|                                 |                                                                                                                                         |
|---------------------------------|-----------------------------------------------------------------------------------------------------------------------------------------|
| <b>Microscope</b>               | <b>Nikon Eclipse Ti-U</b>                                                                                                               |
| <b>Camera</b>                   | <b>Nikon DS-Qi2</b>                                                                                                                     |
| <b>Acquisition Software</b>     | <b>NIS-elements</b>                                                                                                                     |
| <b>Microscope magnification</b> | <b>4 X</b>                                                                                                                              |
| <b>Time points</b>              | <b>0, 24, 48, 72, 96 hours</b>                                                                                                          |
| <b>Sperimental Groups</b>       | <b>No Treatment (NT)<br/>Vehicle (DMSO)<br/>Anagrelide (1, 10 and 100 <math>\mu</math>M)<br/>2H5F (1, 10 and 100 <math>\mu</math>M)</b> |
| <b>Scale</b>                    | <b><math>\mu</math>m</b>                                                                                                                |

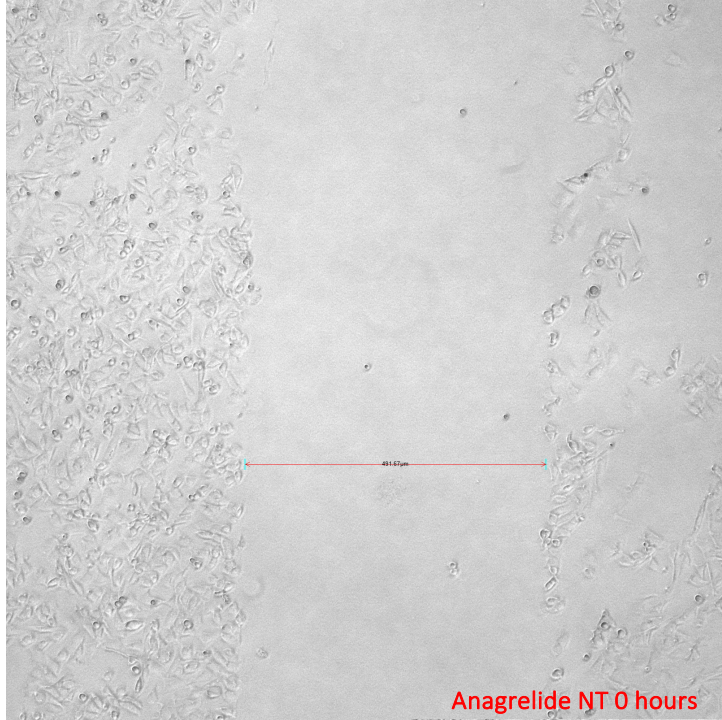

Anagrelide NT 0 hours

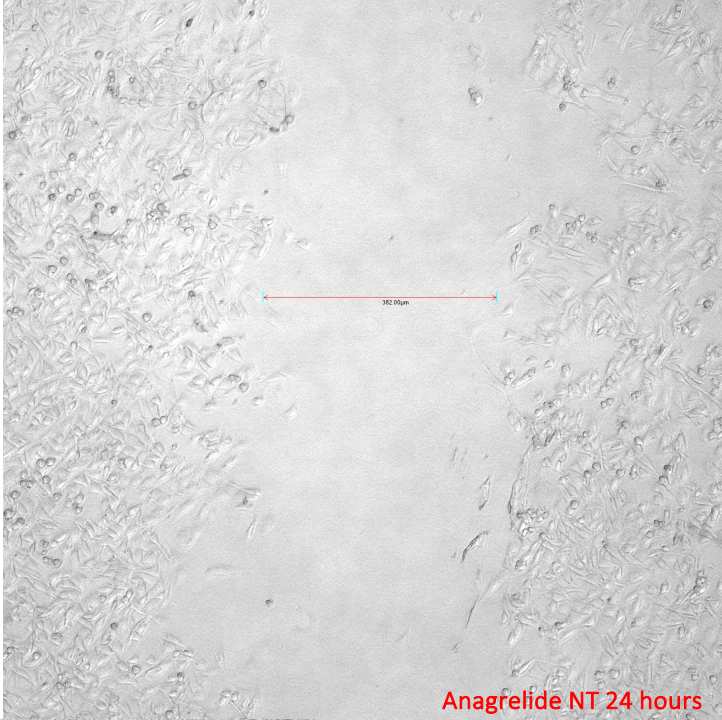

Anagrelide NT 24 hours

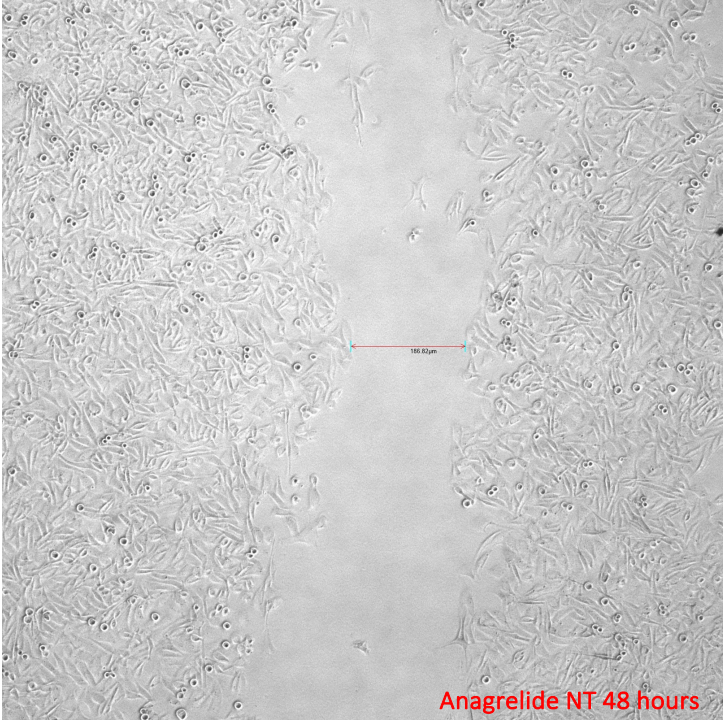

Anagrelide NT 48 hours

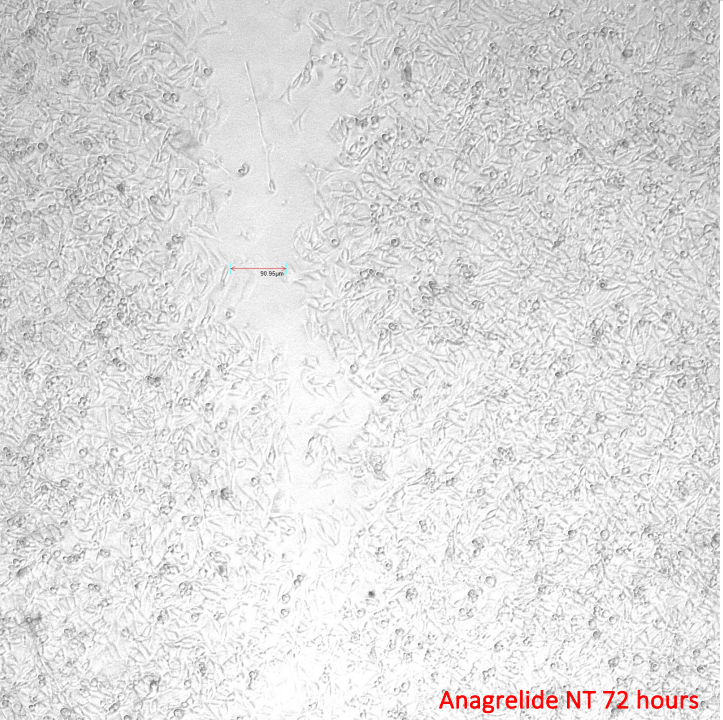

Anagrelide NT 72 hours

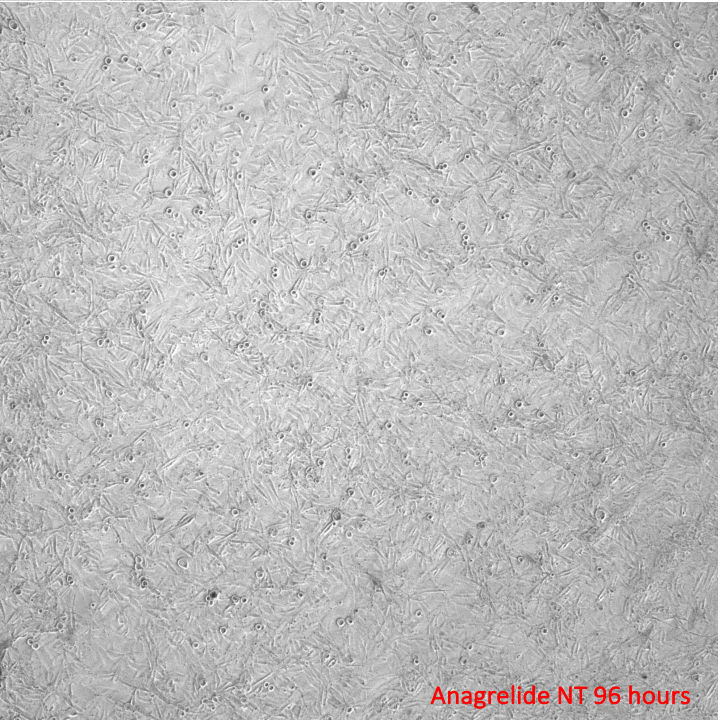

Anagrelide NT 96 hours

Anagrelide – NT  
Group



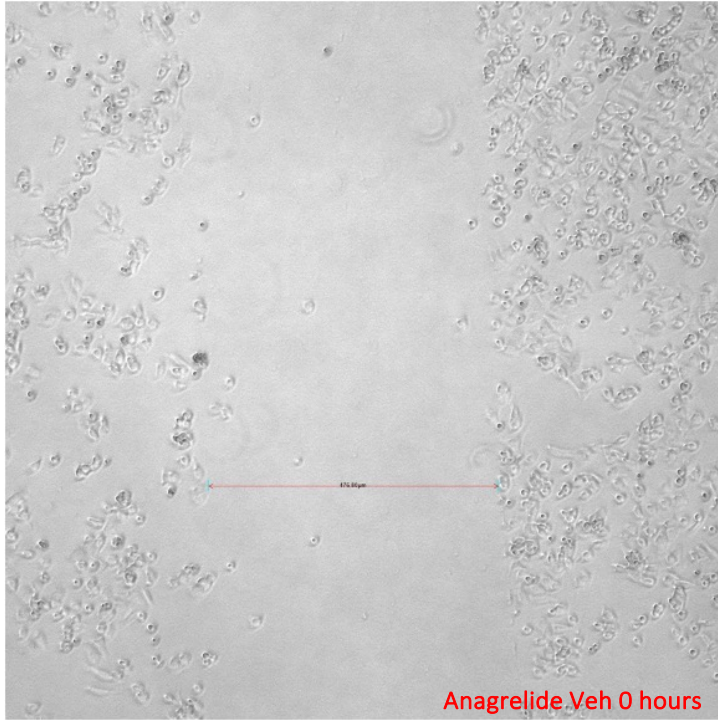

Anagrelide Veh 0 hours

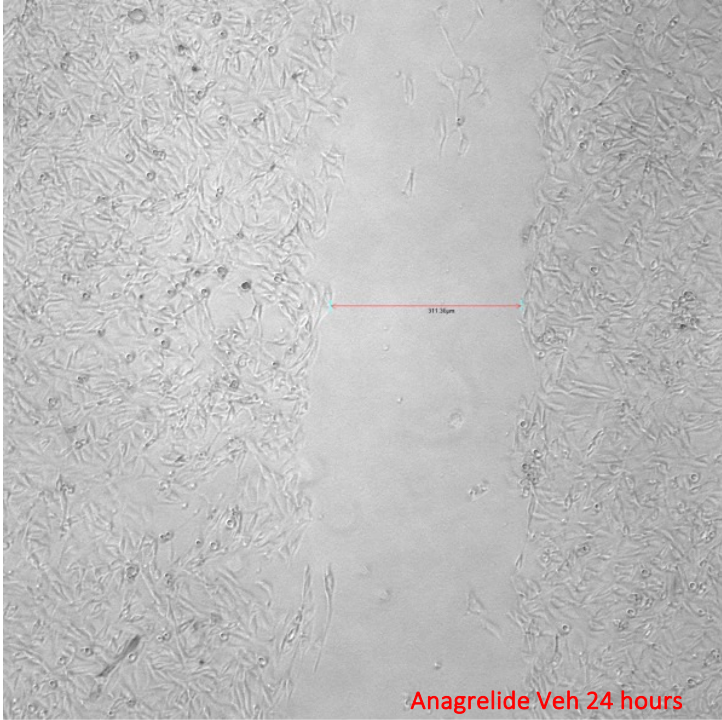

Anagrelide Veh 24 hours

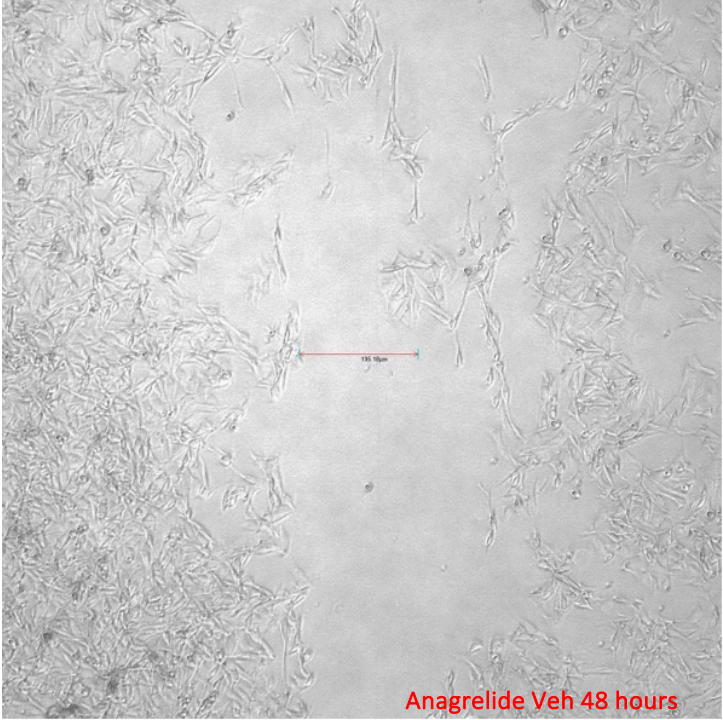

Anagrelide Veh 48 hours

Anagrelide – Veh  
Group

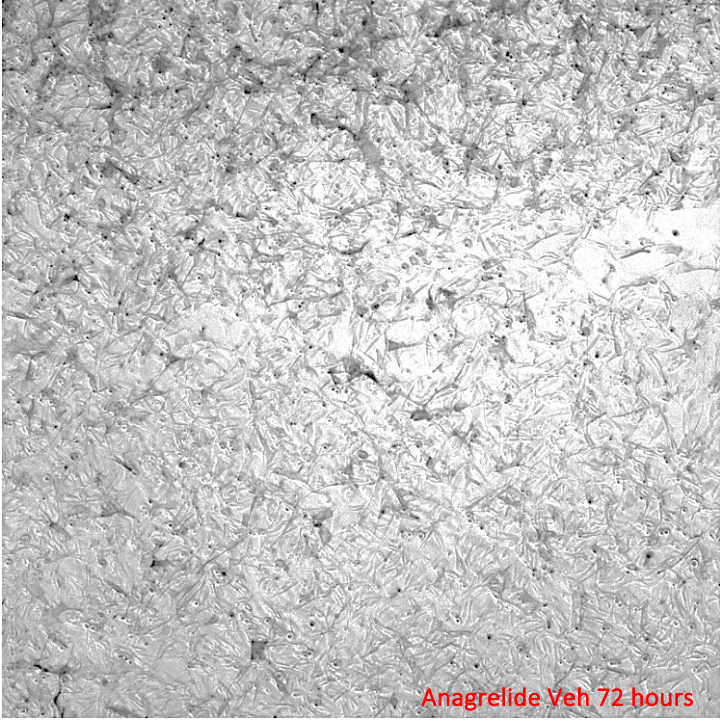

Anagrelide Veh 72 hours

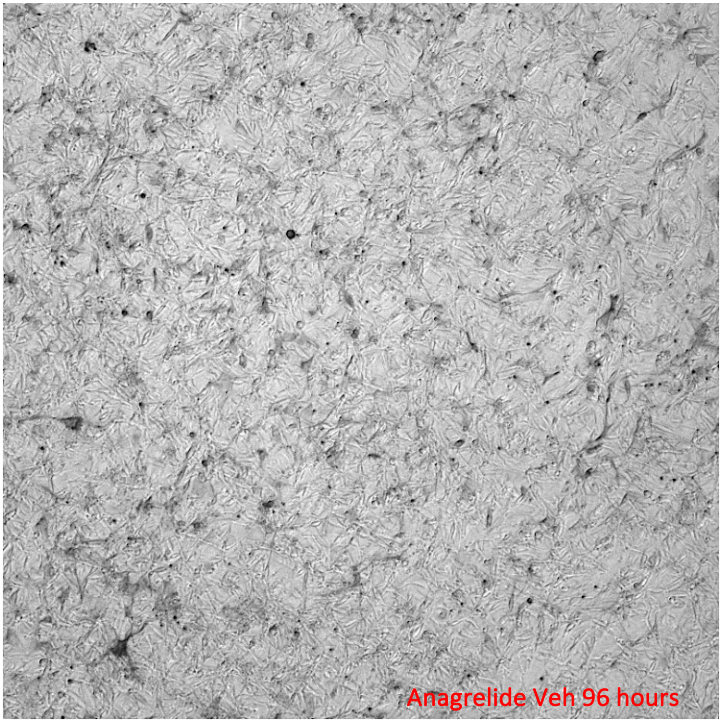

Anagrelide Veh 96 hours



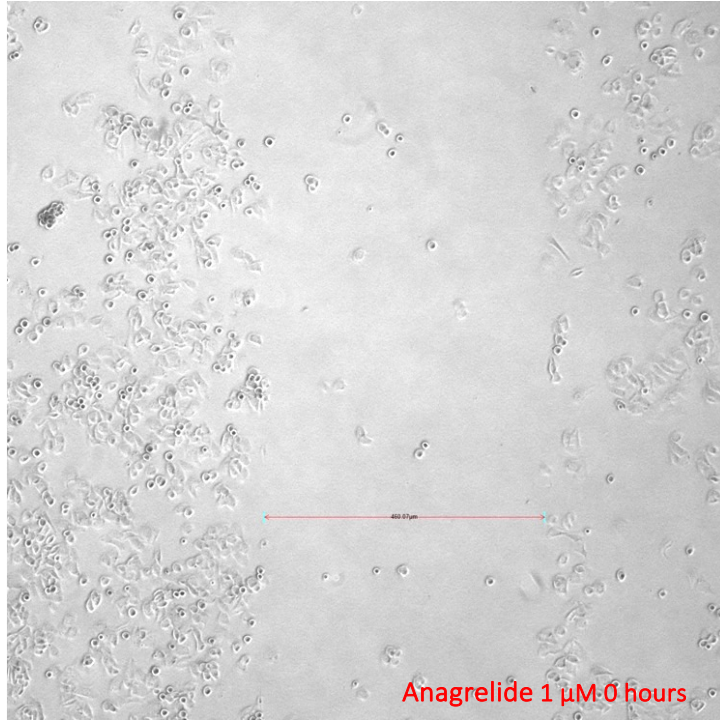

Anagrelide 1  $\mu$ M 0 hours

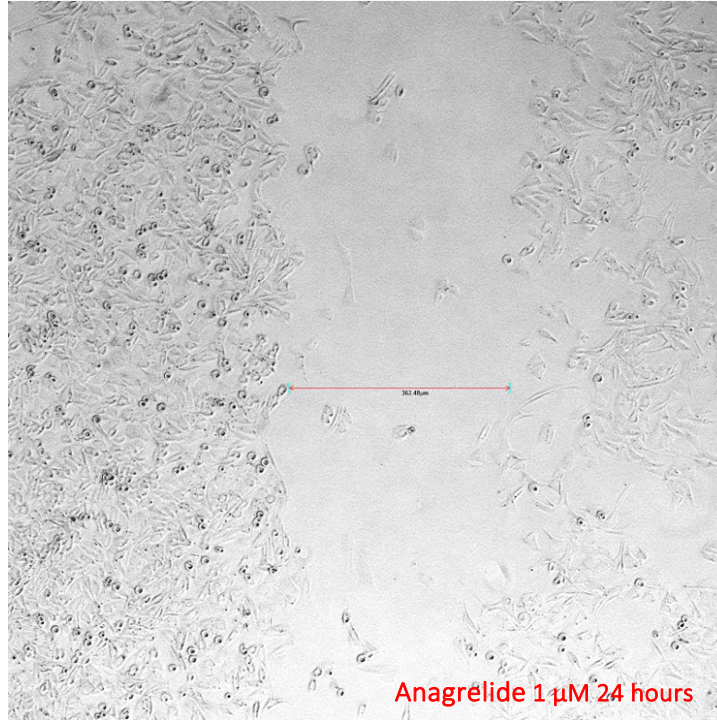

Anagrelide 1  $\mu$ M 24 hours

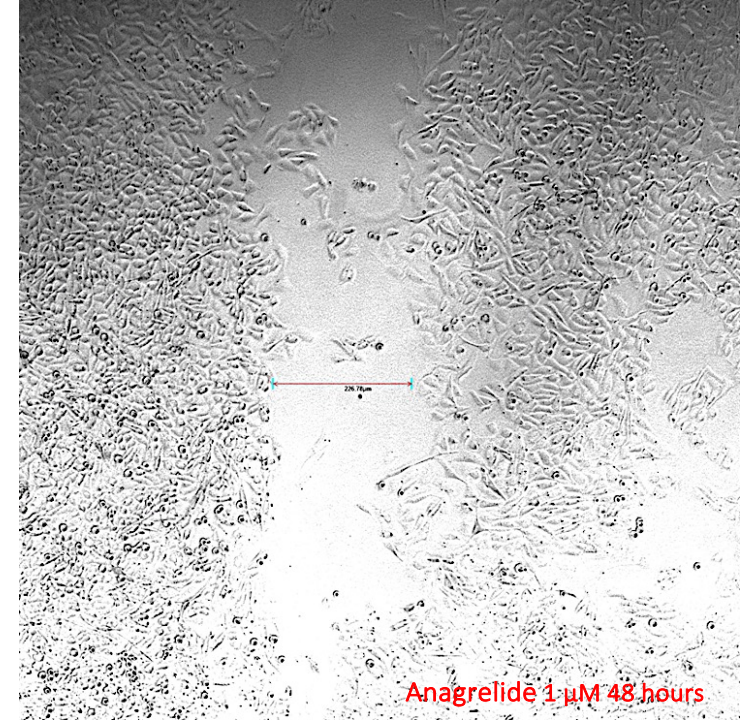

Anagrelide 1  $\mu$ M 48 hours

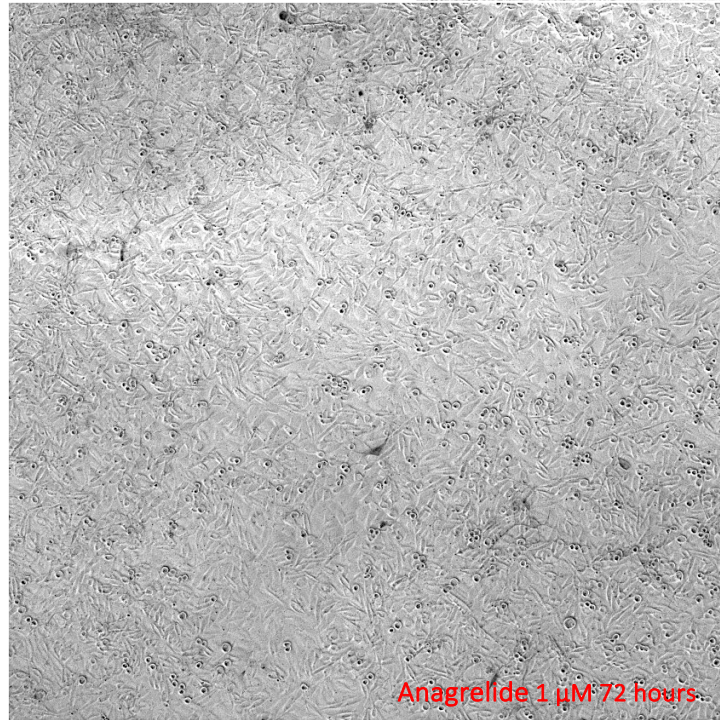

Anagrelide 1  $\mu$ M 72 hours

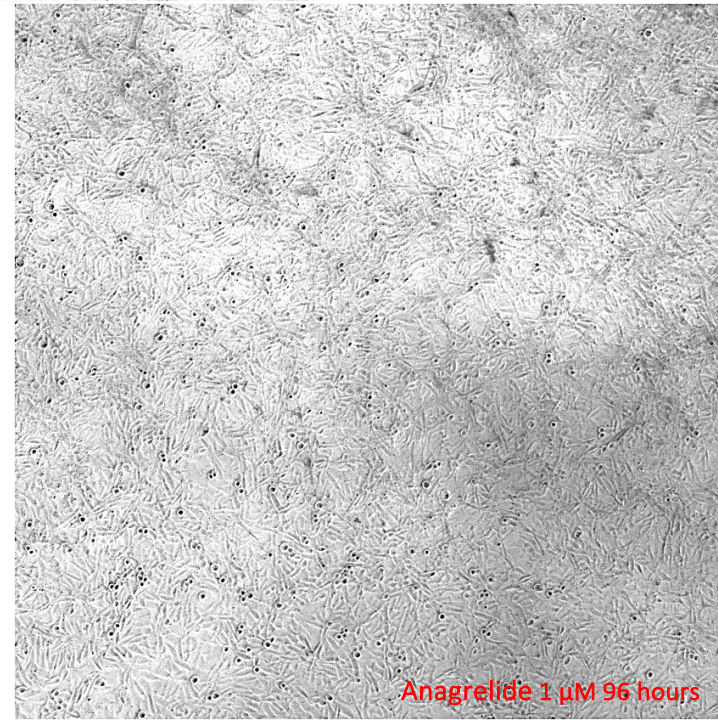

Anagrelide 1  $\mu$ M 96 hours

Anagrelide - 1  $\mu$ M  
Group



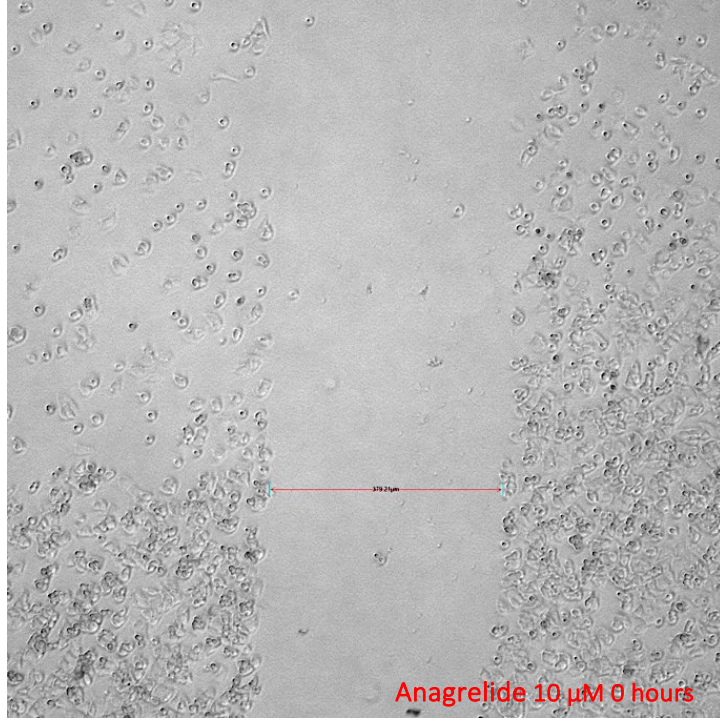

Anagrelide 10  $\mu$ M 0 hours

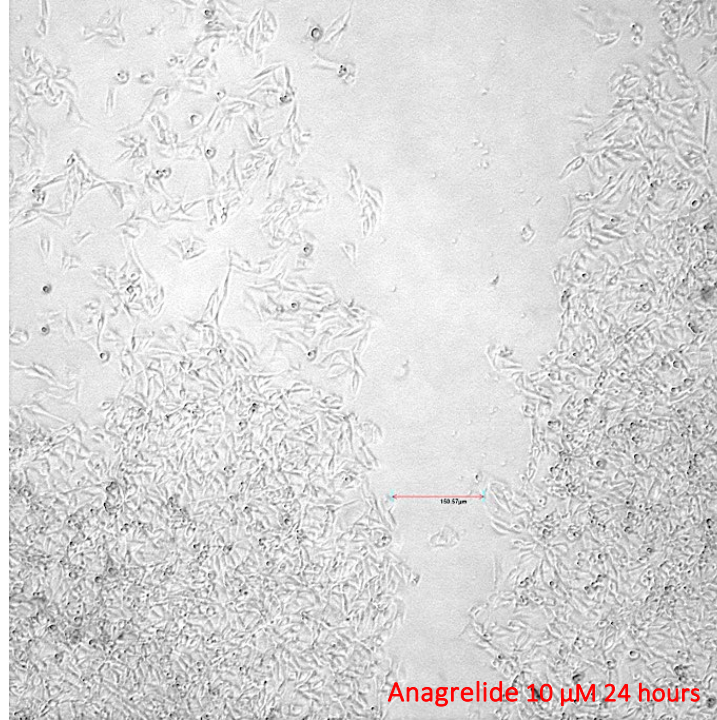

Anagrelide 10  $\mu$ M 24 hours

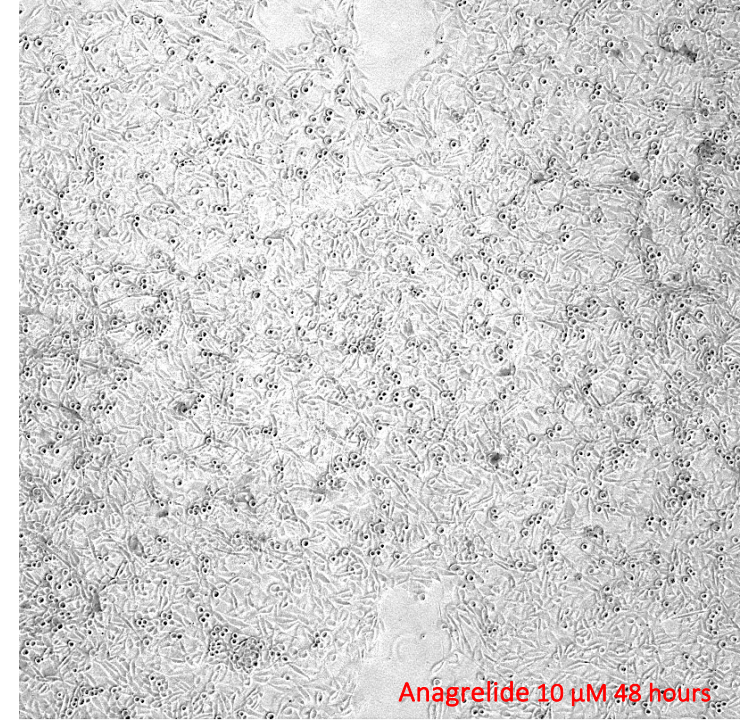

Anagrelide 10  $\mu$ M 48 hours

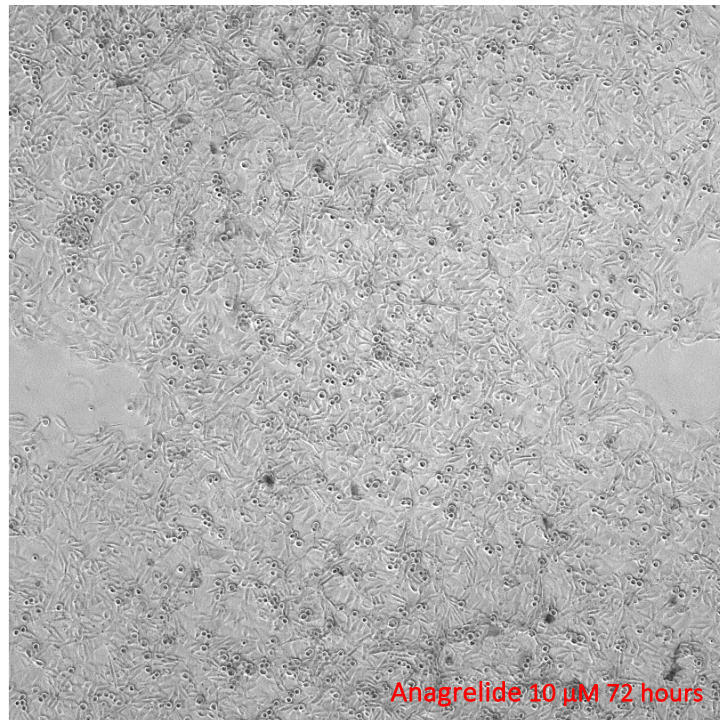

Anagrelide 10  $\mu$ M 72 hours

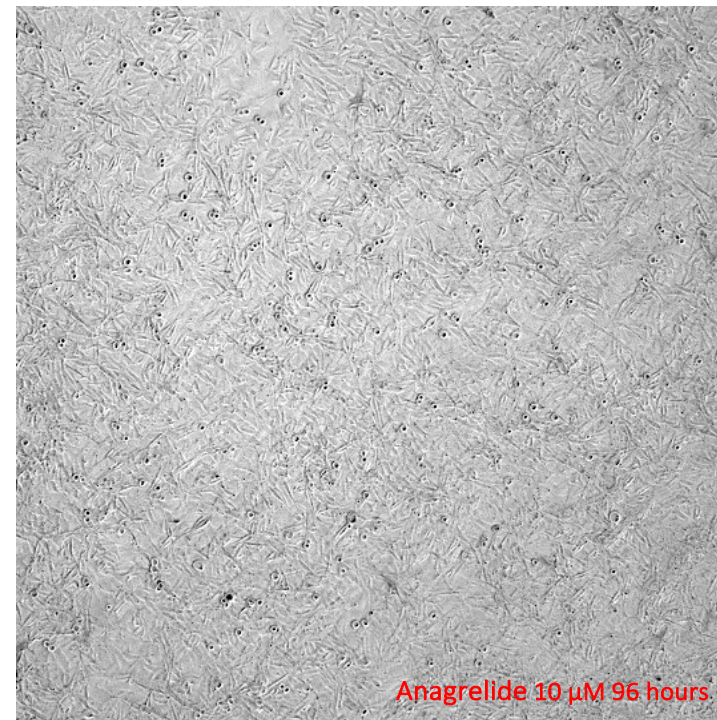

Anagrelide 10  $\mu$ M 96 hours

Anagrelide - 10  $\mu$ M  
Group



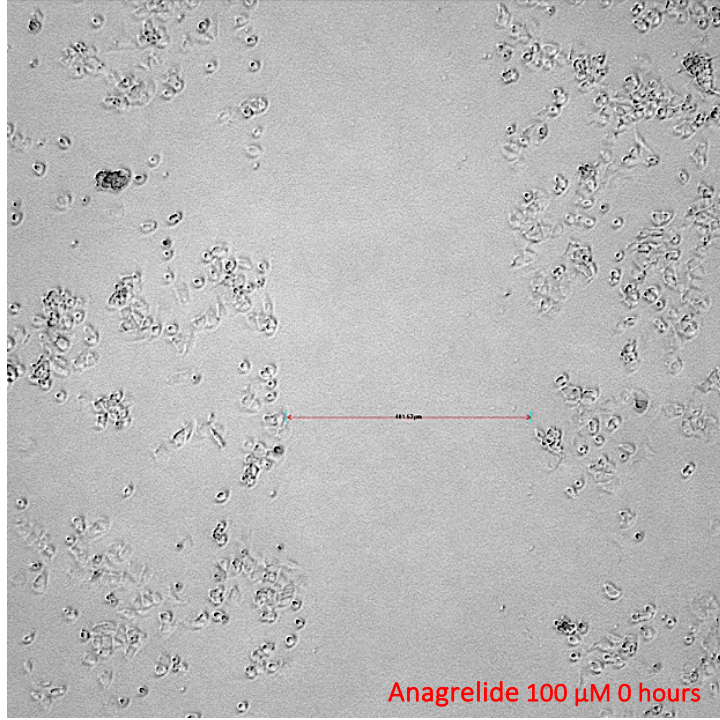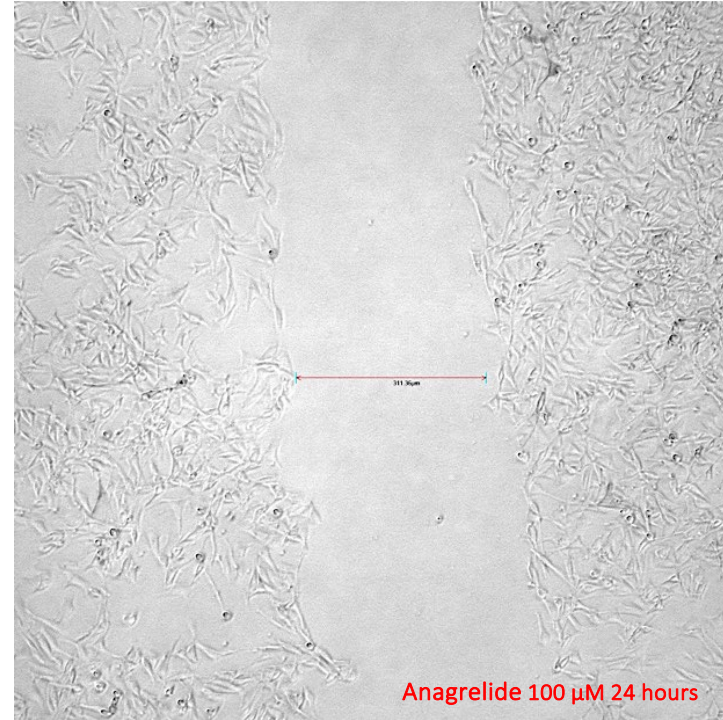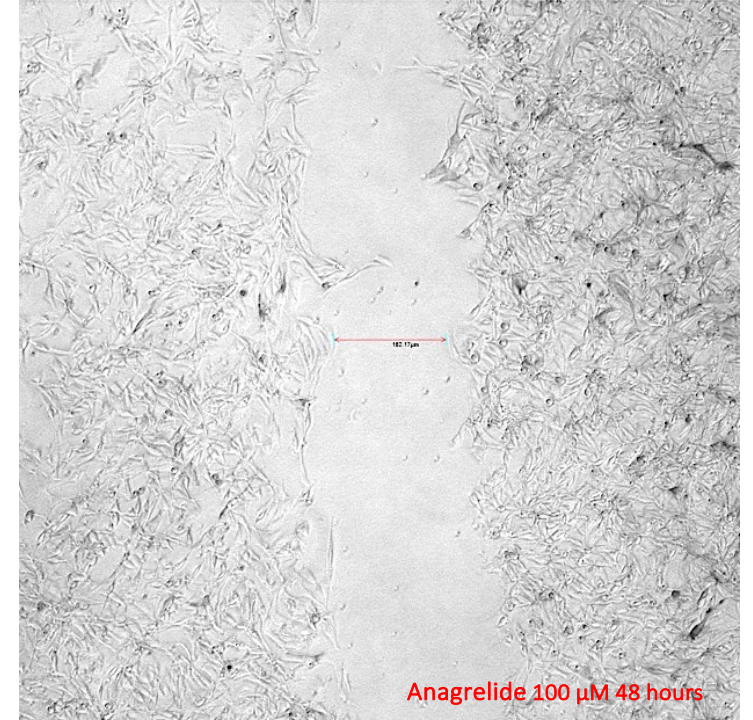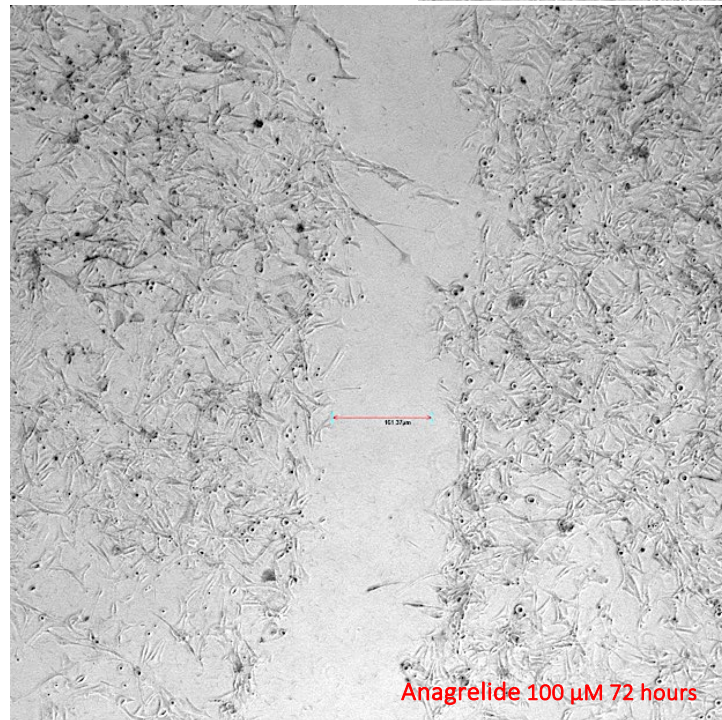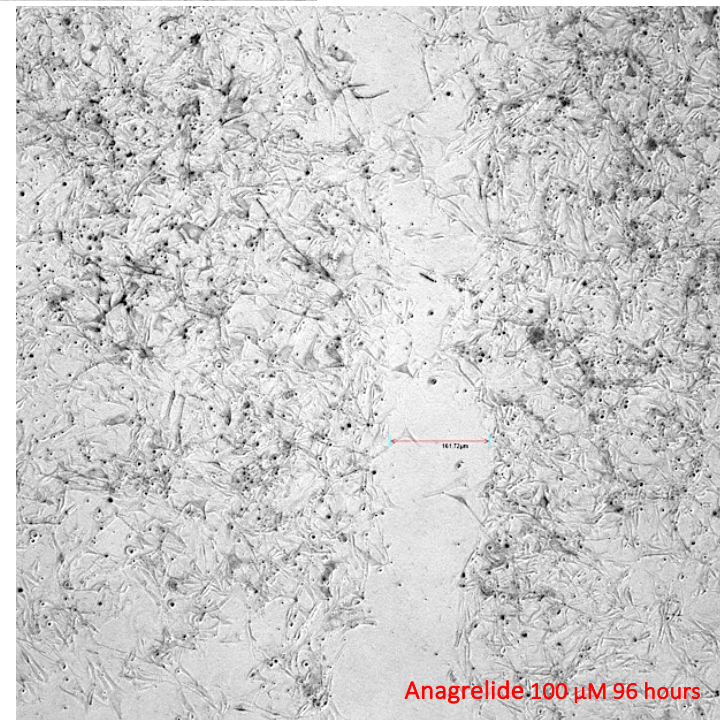

Anagrelide - 100  $\mu$ M  
Group



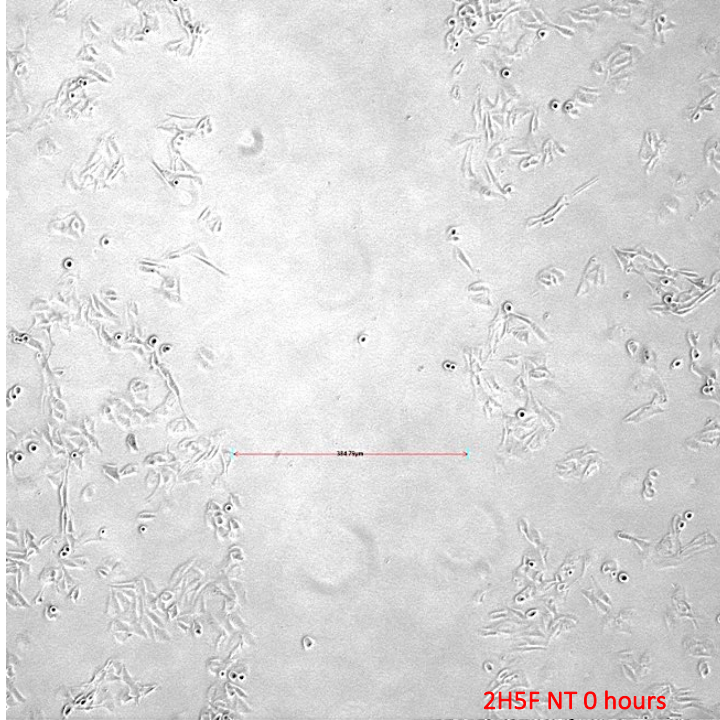

2H5F NT 0 hours

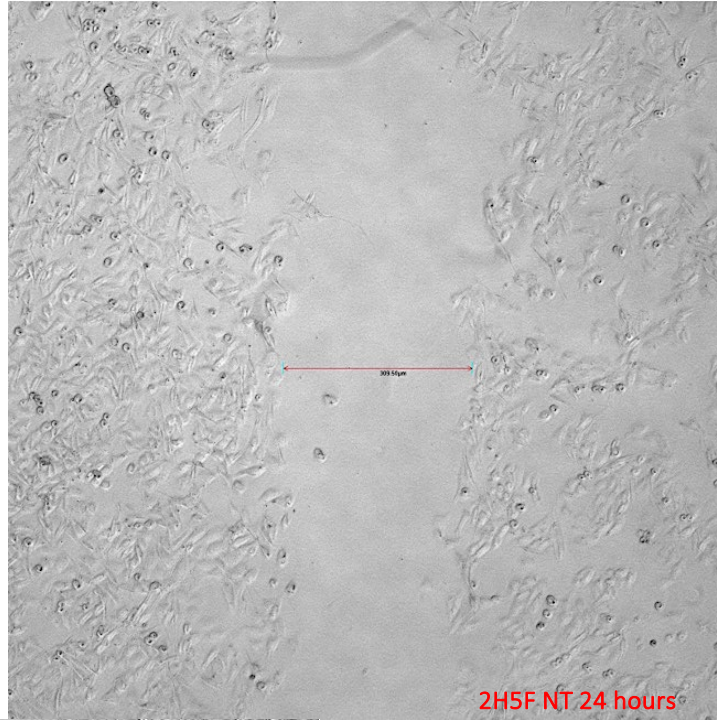

2H5F NT 24 hours

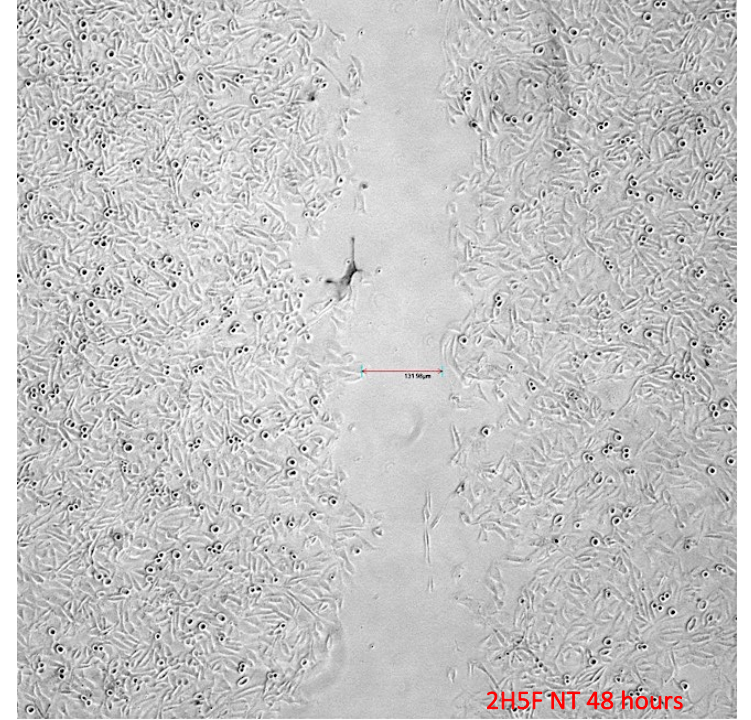

2H5F NT 48 hours

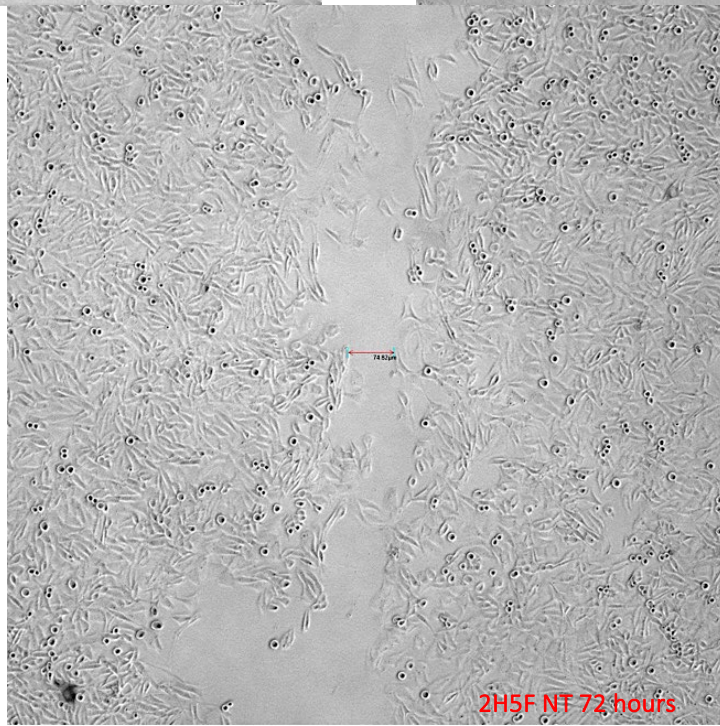

2H5F NT 72 hours

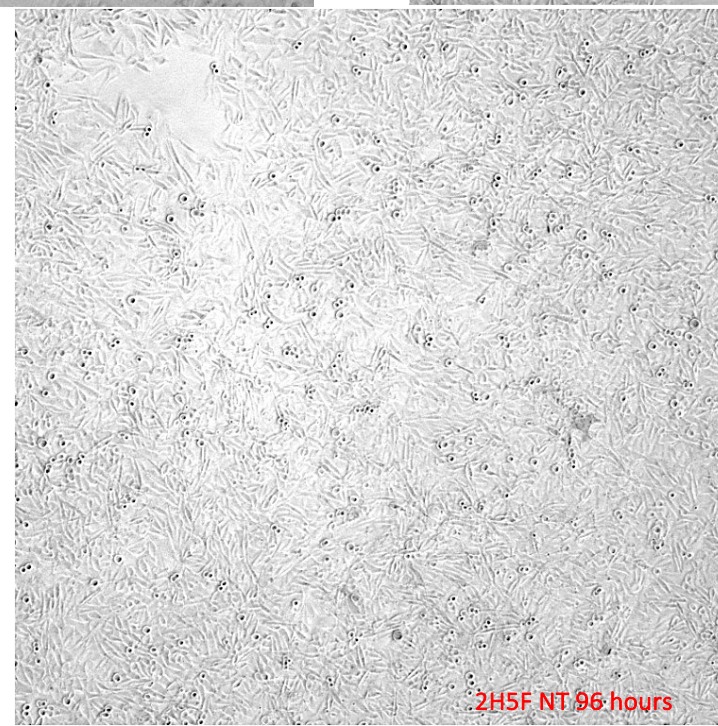

2H5F NT 96 hours

2H5F – NT Group



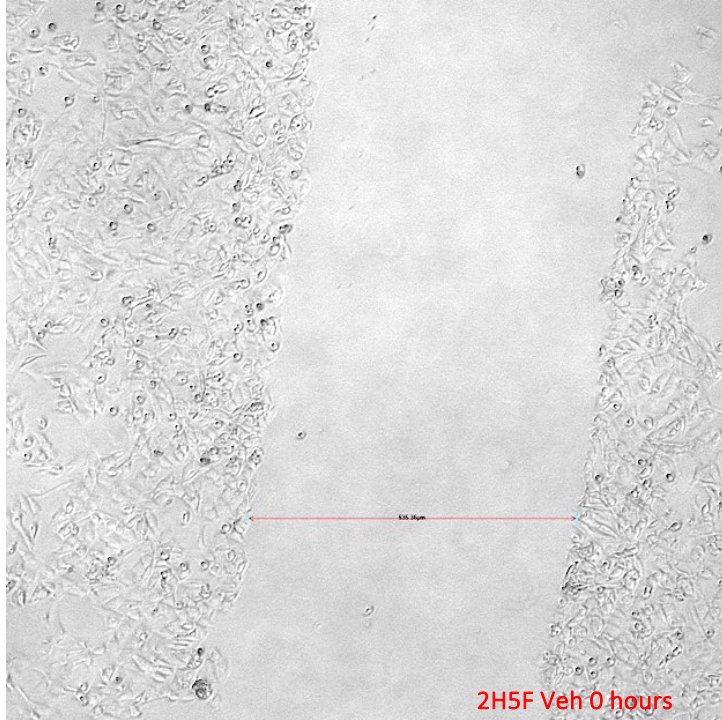

2H5F Veh 0 hours

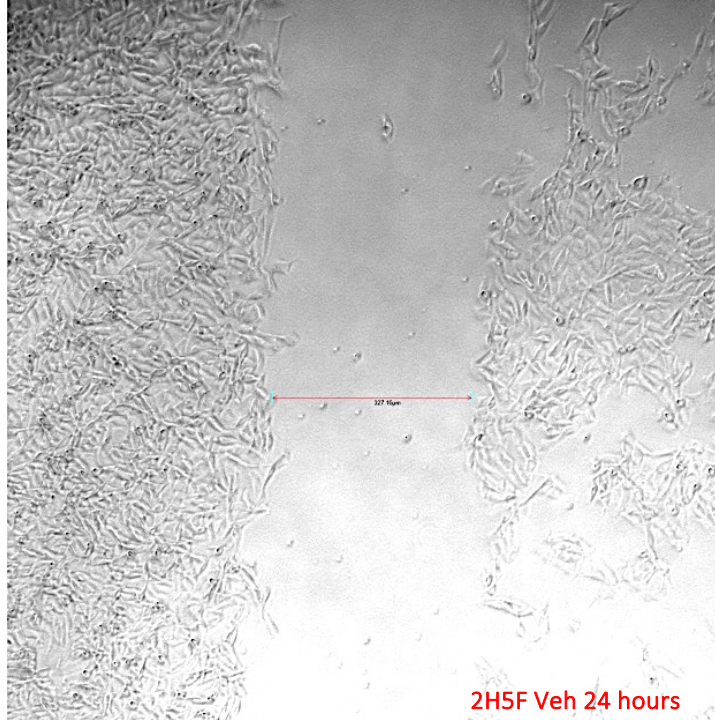

2H5F Veh 24 hours

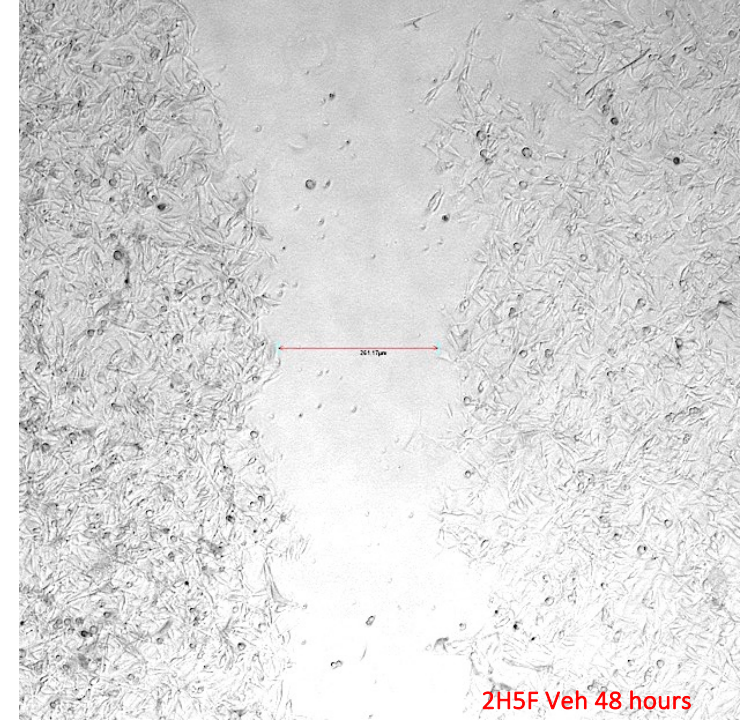

2H5F Veh 48 hours

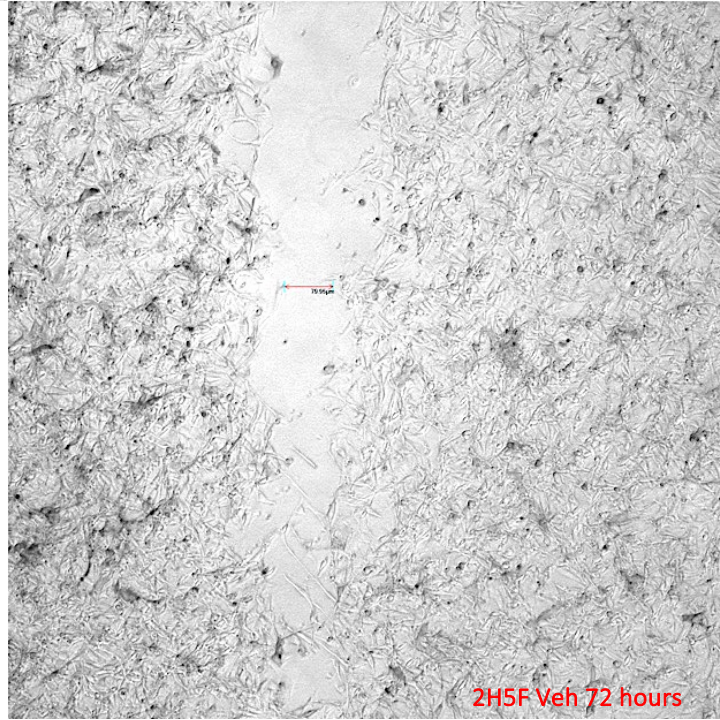

2H5F Veh 72 hours

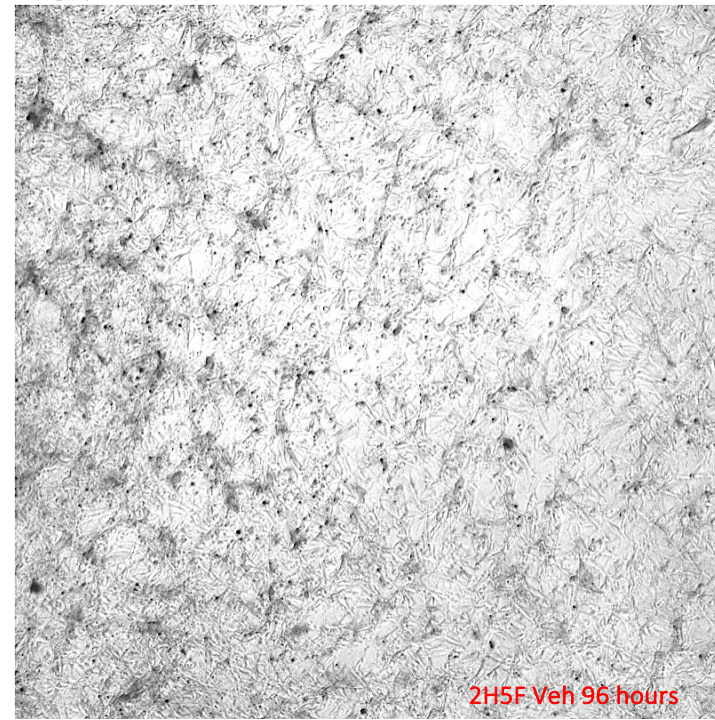

2H5F Veh 96 hours

2H5F – Veh Group



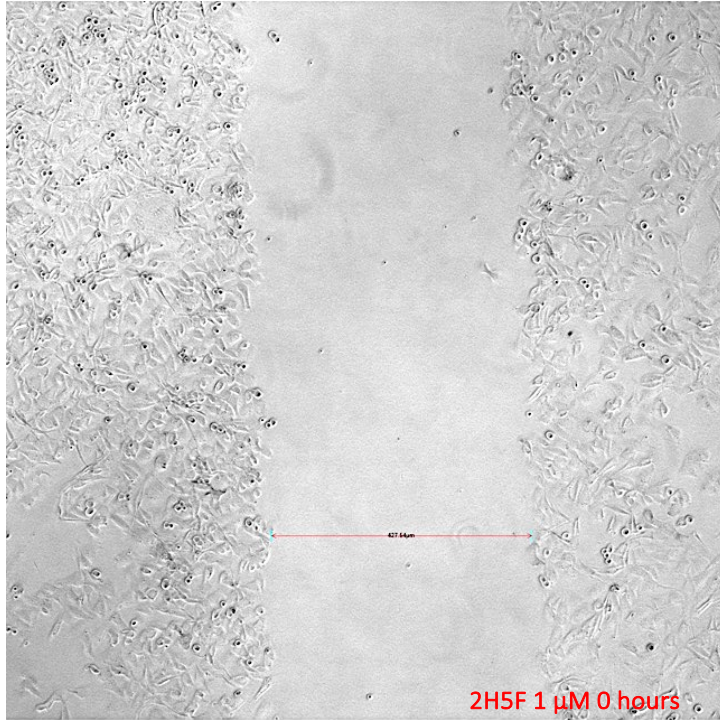

2H5F 1 µM 0 hours

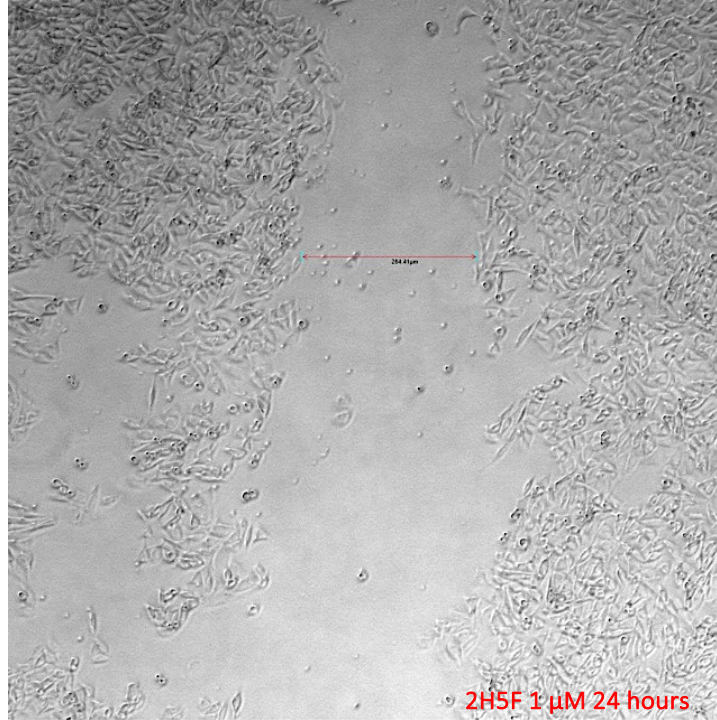

2H5F 1 µM 24 hours

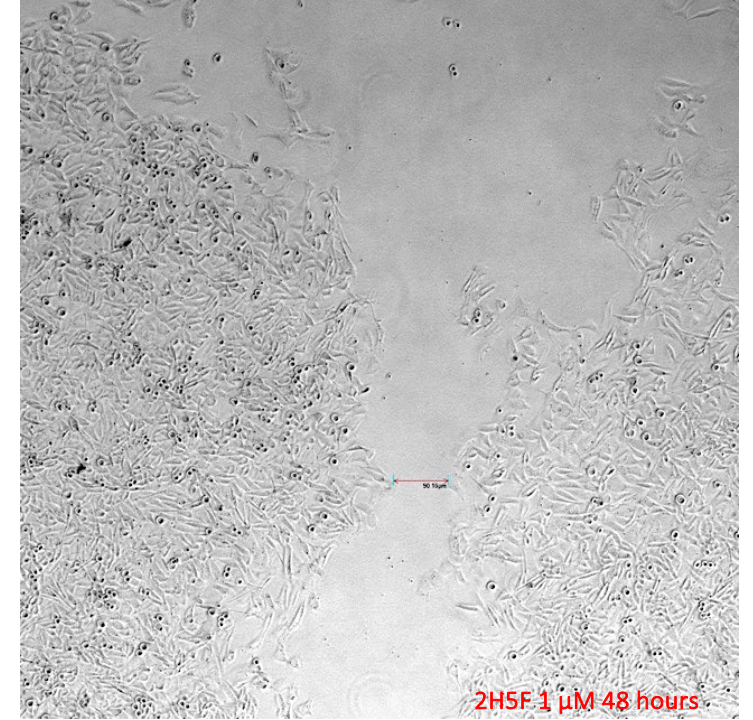

2H5F 1 µM 48 hours

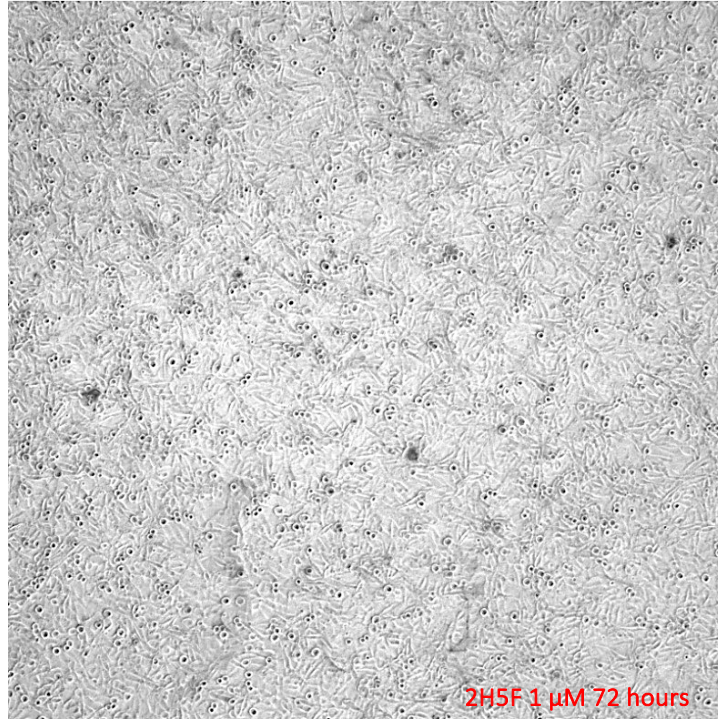

2H5F 1 µM 72 hours

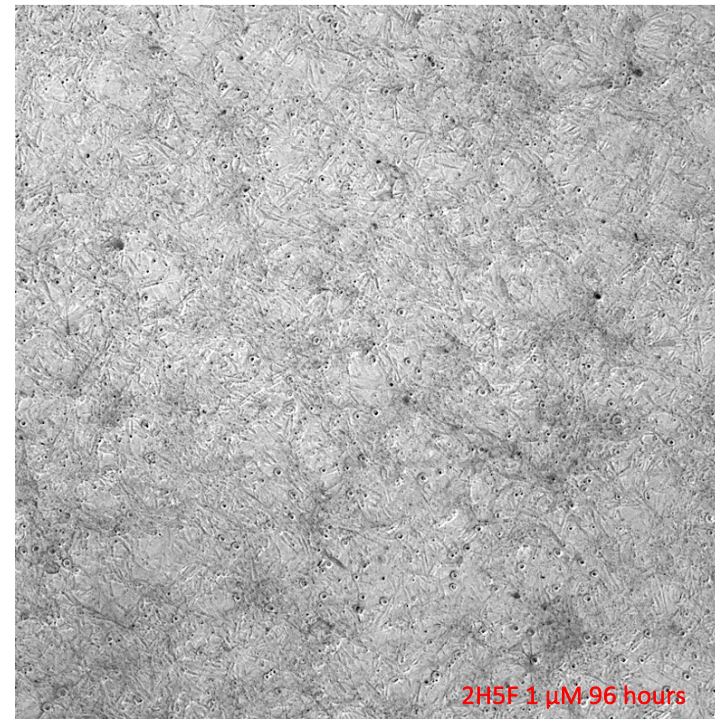

2H5F 1 µM 96 hours

2H5F – 1 µM Group



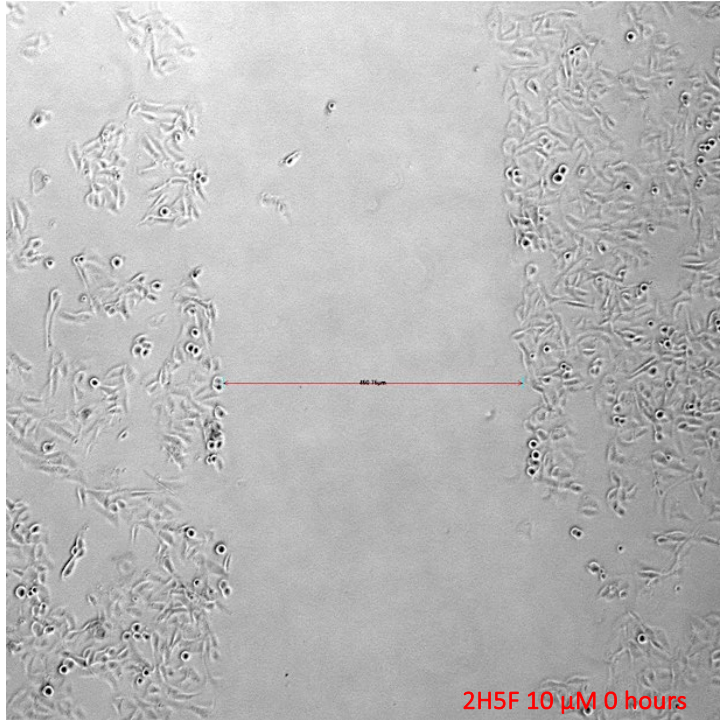

2H5F 10  $\mu$ M 0 hours

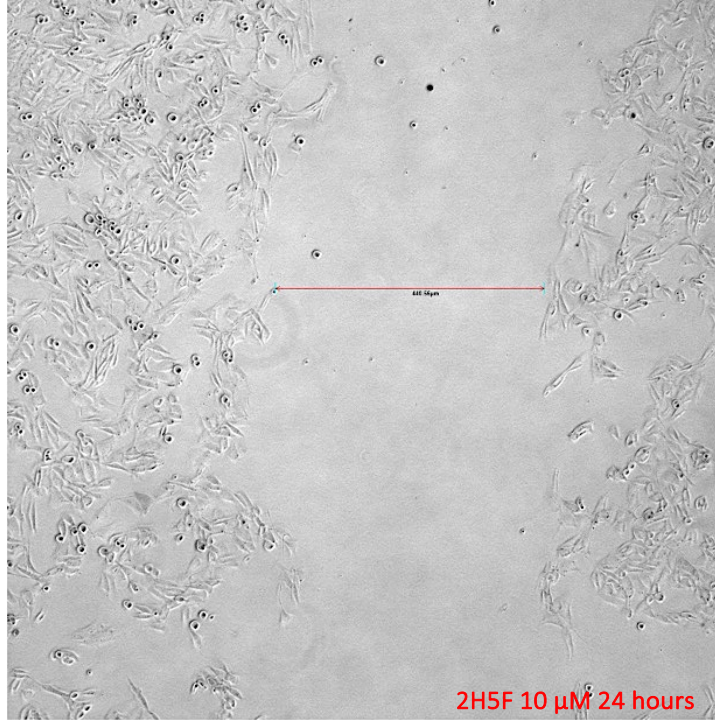

2H5F 10  $\mu$ M 24 hours

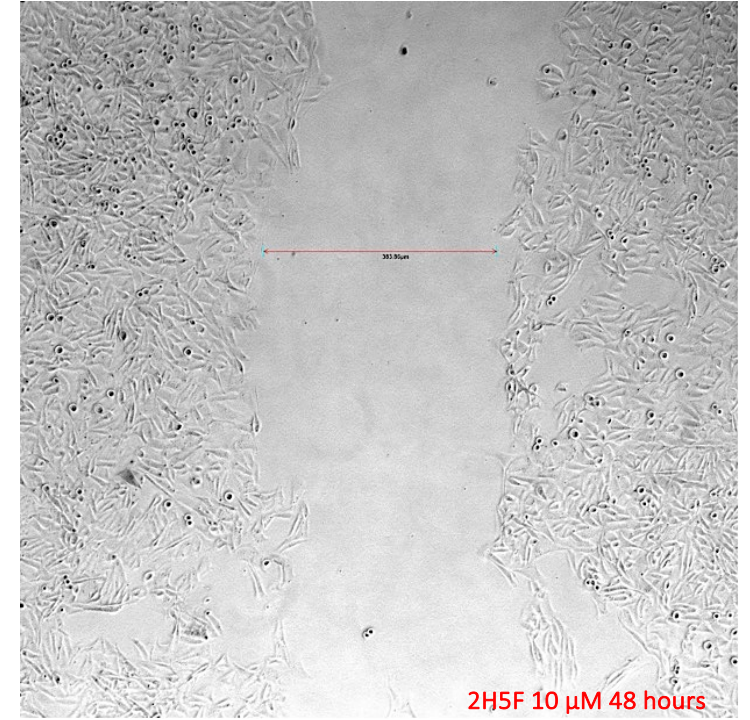

2H5F 10  $\mu$ M 48 hours

2H5F – 10  $\mu$ M  
Group

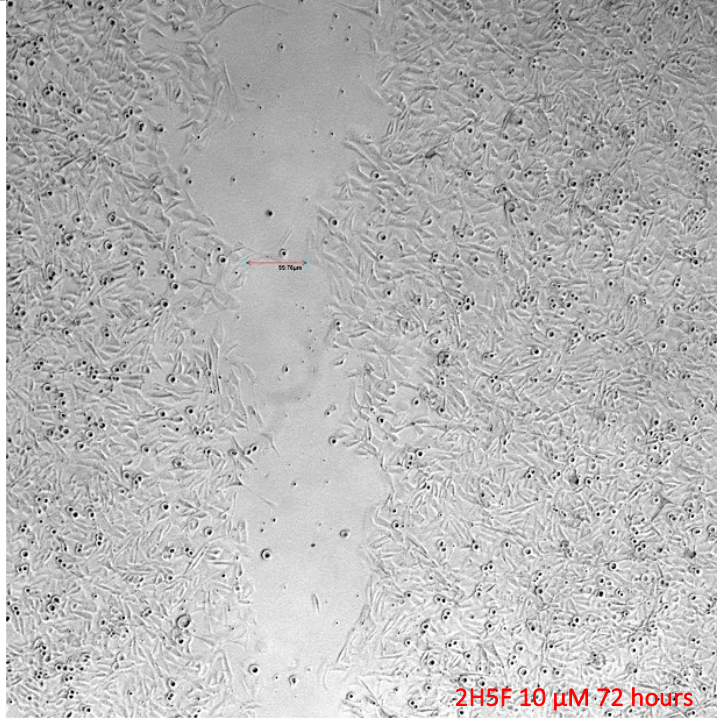

2H5F 10  $\mu$ M 72 hours

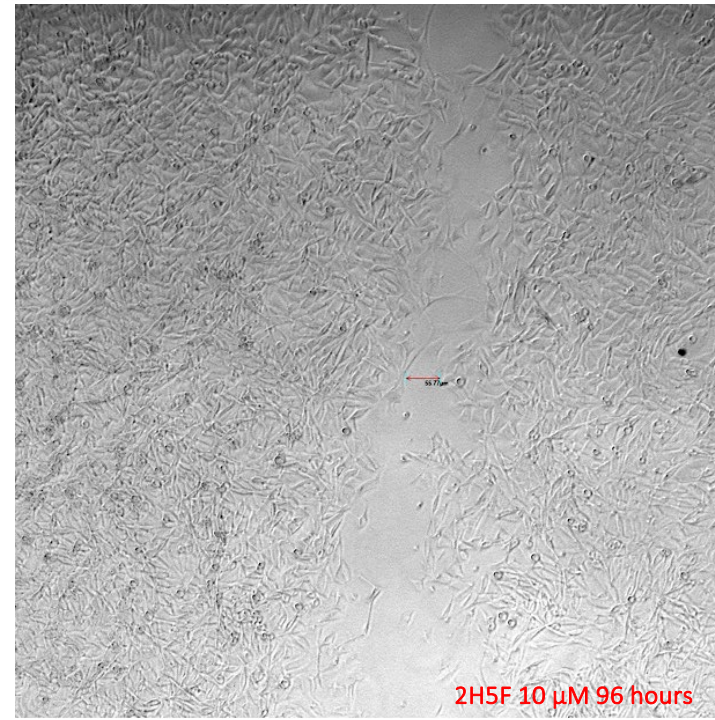

2H5F 10  $\mu$ M 96 hours



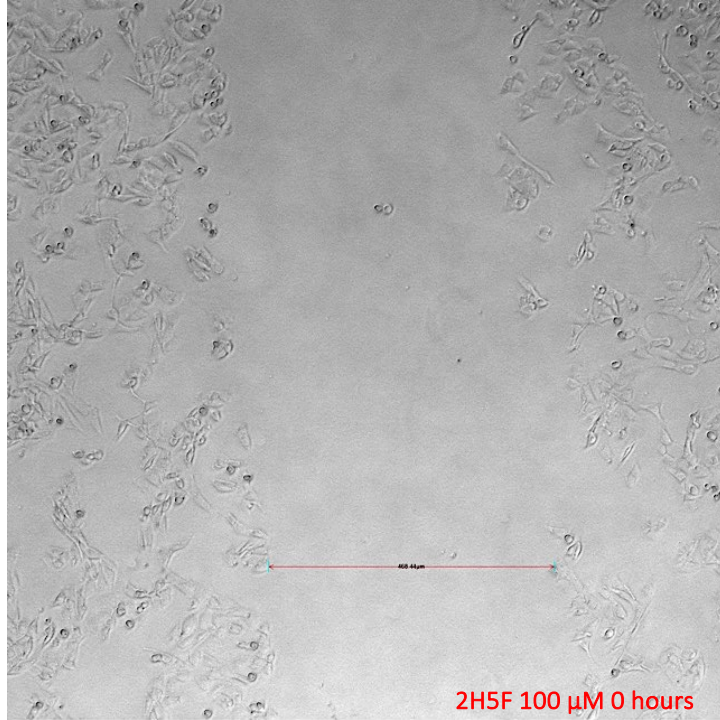

2H5F 100 µM 0 hours

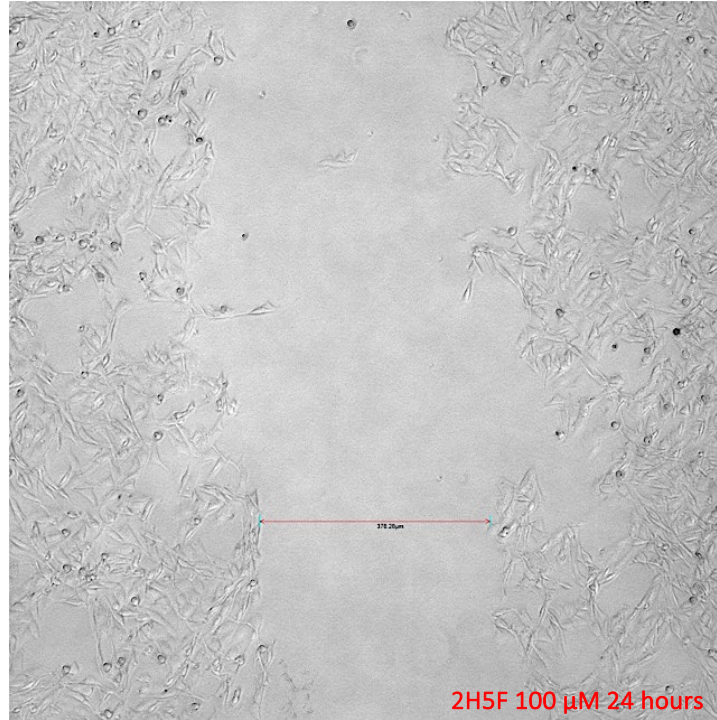

2H5F 100 µM 24 hours

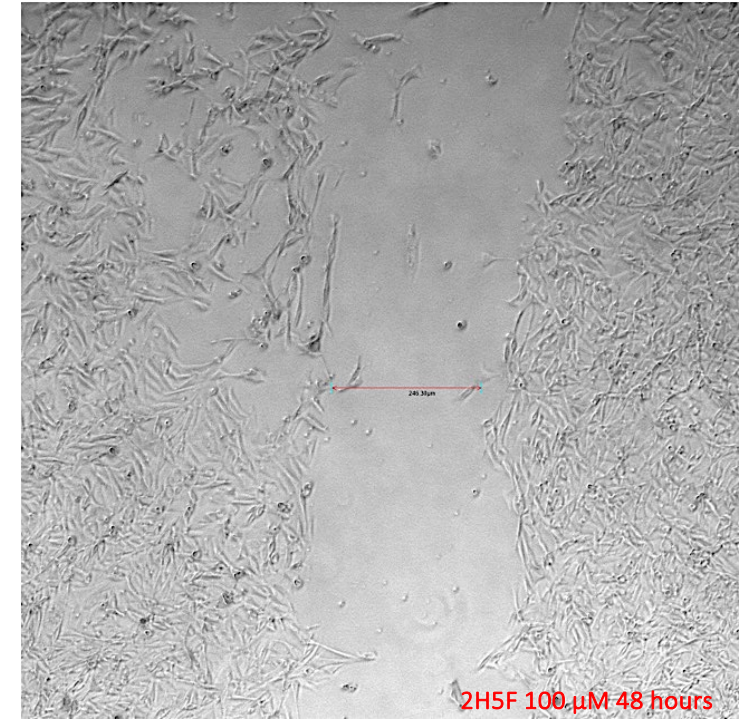

2H5F 100 µM 48 hours

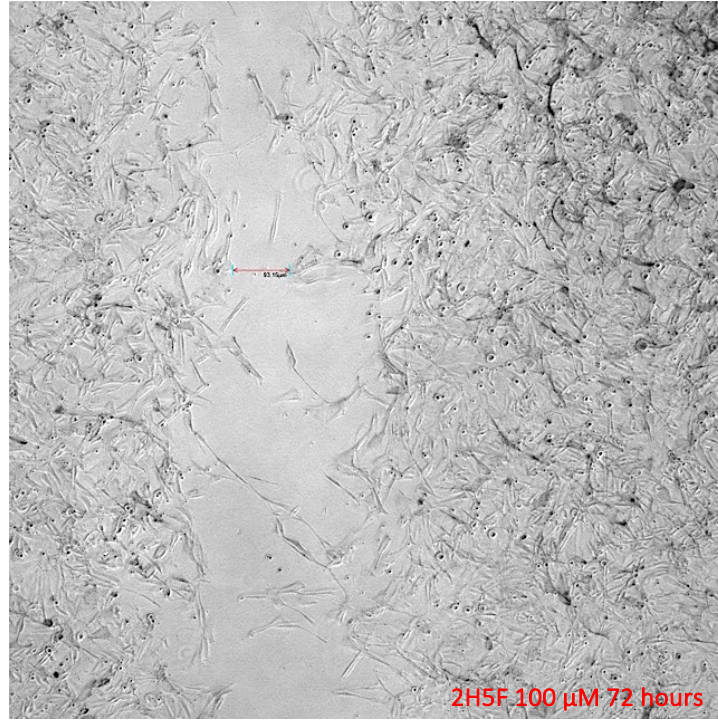

2H5F 100 µM 72 hours

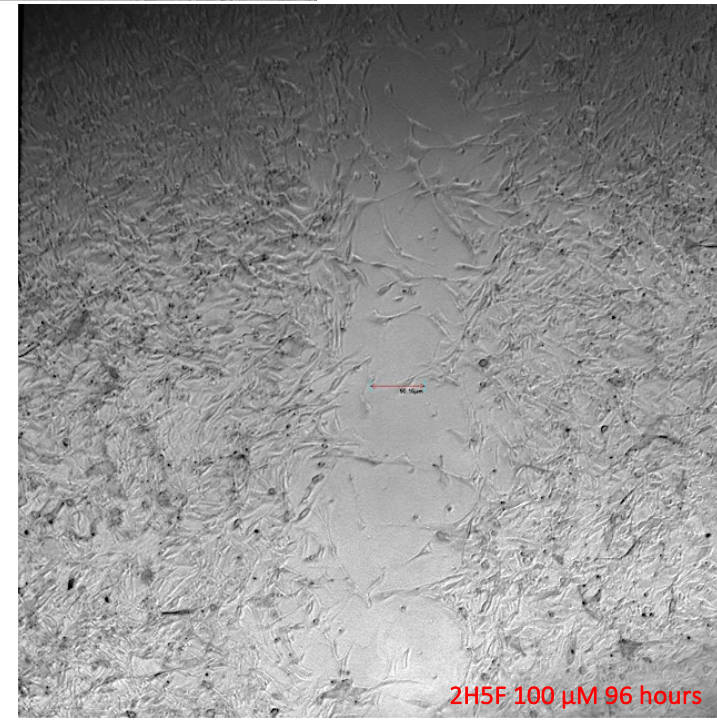

2H5F 100 µM 96 hours

2H5F – 100 µM  
Group
